# Supplementary material for: Dissecting the Within-Africa Ancestry of Populations of African Descent in the Americas
Source: PLoS One. 2011 Jan 6;6(1):e14495. doi: 10.1371/journal.pone.0014495 (PMC3017210; doi:10.1371/journal.pone.0014495)
Supplement: File S4 — AIMs. (0.04 MB XLS) [file pone.0014495.s004.xls]

## Sheet: Sheet1
paper	rs #	Chr	Gene Name
Lao, 2006	rs1344870	3	VENTXP7
Lao, 2006	rs1363448	5	PCDHGA9
Lao, 2006	rs1823718	15	TBC1D21
Lao, 2006	rs1858465	17
Lao, 2006	rs1876482	2
Lao, 2006	rs714857	11	SOX6
Lao, 2006	rs722869	14	VRK1
Lao, 2006	rs735612	15	RYR3
Lao, 2006	rs952718	2
Reiner, 2005	rs1042602	11	TYR
Reiner, 2005	rs1800498	11	DRD2
Reiner, 2005	rs1985080	7
Reiner, 2005	rs2077863	18
Reiner, 2005	rs2814778	1	DARC
Reiner, 2005	rs2816	17	GUCY2D
Reiner, 2005	rs2891	17
Reiner, 2005	rs3287	2	SPTBN1
Reiner, 2005	rs518116	9	RALGPS1
Reiner, 2005	rs584059	3
Reiner, 2005	rs6003	1
Reiner, 2005	rs7041	4
Reiner, 2005	rs722098	21
Reiner, 2005	rs723632	1	PROX1
Reiner, 2005	rs7349	10	TCF8
Reiner, 2005	rs930072	5	SLC1A3
Reiner, 2005	rs994174	10	NRG3
Tian, 2006	rs10041728	5	FTMT
Tian, 2006	rs10056388	5
Tian, 2006	rs1011643	20	MACROD2
Tian, 2006	rs10124991	9	SMARCA2
Tian, 2006	rs10195705	2	CTTNA2
Tian, 2006	rs10202705	2
Tian, 2006	rs10255169	7	CNTNAP2
Tian, 2006	rs1043809	17	EPN2
Tian, 2006	rs10806263	6	SNAP91
Tian, 2006	rs10842753	12	ITPR2
Tian, 2006	rs10908312	1	CSF3R
Tian, 2006	rs10952147	7	PER4
Tian, 2006	rs10962612	9
Tian, 2006	rs11000419	10	CCND1
Tian, 2006	rs11150219	16
Tian, 2006	rs1117382	2	THSD7B
Tian, 2006	rs11223503	11	OPCML
Tian, 2006	rs1125217	11	ZDHHC13
Tian, 2006	rs11264110	1	SFPQ
Tian, 2006	rs11607932	11	CCND1
Tian, 2006	rs11901793	2	CXCR7
Tian, 2006	rs12129648	1	KIF26B
Tian, 2006	rs1256197	3	PARP14
Tian, 2006	rs1257010	2
Tian, 2006	rs12594483	15
Tian, 2006	rs12612040	2	CALM2
Tian, 2006	rs12640848	4	ENAM
Tian, 2006	rs12676654	8	PAG1
Tian, 2006	rs12692701	2	FIGN
Tian, 2006	rs12900262	15
Tian, 2006	rs12900552	15	NIPA1
Tian, 2006	rs12926237	16
Tian, 2006	rs12945601	17	RAI1
Tian, 2006	rs12997060	2
Tian, 2006	rs1303629	3	RARB
Tian, 2006	rs13080353	3	SPSB4
Tian, 2006	rs13169284	5	CMBL
Tian, 2006	rs13173738	5
Tian, 2006	rs13178470	5	SGCD
Tian, 2006	rs13261248	8	HAS2
Tian, 2006	rs13318432	3	GADL1
Tian, 2006	rs1335826	10
Tian, 2006	rs1372115	2	ACVR1B
Tian, 2006	rs1372894	4
Tian, 2006	rs1380014	5	PPP2R2B
Tian, 2006	rs1412521	9	DBC1
Tian, 2006	rs1415723	9	PTPRD
Tian, 2006	rs1426654	15	SLC24A5
Tian, 2006	rs1462309	3
Tian, 2006	rs1470608	15	OCA2
Tian, 2006	rs1477921	13
Tian, 2006	rs1490728	12	CAPZA3
Tian, 2006	rs1508061	2	EXOC6B
Tian, 2006	rs155409	3	CNTN6
Tian, 2006	rs16891982	5	SLC45A2
Tian, 2006	rs17049450	2
Tian, 2006	rs17261772	2	RAB3GAP1
Tian, 2006	rs17269594	15	MYO1E
Tian, 2006	rs1733731	10
Tian, 2006	rs17520733	7	WBSCR17
Tian, 2006	rs1862819	16	MPHOSPH6
Tian, 2006	rs1870571	8	STMN2
Tian, 2006	rs1885167	9
Tian, 2006	rs1911999	10
Tian, 2006	rs1917028	5
Tian, 2006	rs1982235	2
Tian, 2006	rs1991818	19	KLK7
Tian, 2006	rs2075902	21	RUNX1
Tian, 2006	rs2184033	10	IPMK
Tian, 2006	rs222674	14	ZFHX2
Tian, 2006	rs2246695	14
Tian, 2006	rs228768	17	HDAC5
Tian, 2006	rs2416791	12	ETV6
Tian, 2006	rs2426515	20	DOK5
Tian, 2006	rs2451563	6
Tian, 2006	rs2488465	9	STRBP
Tian, 2006	rs2593595	17	G6PC
Tian, 2006	rs2596793	12	PPP1R12A
Tian, 2006	rs2660769	3	VGLL3
Tian, 2006	rs2687427	4
Tian, 2006	rs2777804	9
Tian, 2006	rs316598	5
Tian, 2006	rs328744	12	RAB21
Tian, 2006	rs33957	5	FGF1
Tian, 2006	rs344454	7	CNTNAP2
Tian, 2006	rs3755446	2	TTC31
Tian, 2006	rs3759171	12	TBC1D15
Tian, 2006	rs3791896	2	TNS1
Tian, 2006	rs385194	4	NKX6
Tian, 2006	rs3861709	9	BCN2
Tian, 2006	rs4143633	8	SNTG
Tian, 2006	rs4149436	2	SULT1C4
Tian, 2006	rs4350528	15
Tian, 2006	rs4489979	15
Tian, 2006	rs4506877	15	SLCO3A1
Tian, 2006	rs4529792	10
Tian, 2006	rs4602918	8	CSMD1
Tian, 2006	rs4619931	4	SLC30A9
Tian, 2006	rs4659762	1	MT1P2
Tian, 2006	rs4789070	17
Tian, 2006	rs4792105	17
Tian, 2006	rs4793237	17
Tian, 2006	rs4811651	20
Tian, 2006	rs4823460	22	FAM118A
Tian, 2006	rs4859147	3	DCUN1D1
Tian, 2006	rs4885162	13
Tian, 2006	rs4896780	6
Tian, 2006	rs4923940	15	GANC
Tian, 2006	rs503677	10	HERC4
Tian, 2006	rs567357	15	TGM7
Tian, 2006	rs6023376	20	DOK5
Tian, 2006	rs6414248	3	PVRL3
Tian, 2006	rs645510	12	KSR2
Tian, 2006	rs6491743	13
Tian, 2006	rs6494466	15	CSNK1G1
Tian, 2006	rs6535244	4	RHOA
Tian, 2006	rs6556352	5	SGCD
Tian, 2006	rs6666101	1	SLC22A3
Tian, 2006	rs6765491	3
Tian, 2006	rs6820509	4	WFS1
Tian, 2006	rs6937164	6	MOXD1
Tian, 2006	rs7021690	9
Tian, 2006	rs7086	15	VPS39
Tian, 2006	rs710052	14
Tian, 2006	rs7107482	11	NAV2
Tian, 2006	rs7111814	11	P2RY2
Tian, 2006	rs7134682	12
Tian, 2006	rs7161	1	DPH2
Tian, 2006	rs7187359	16
Tian, 2006	rs7189172	16
Tian, 2006	rs735480	15
Tian, 2006	rs7424137	2	COL3A1
Tian, 2006	rs7512316	1	SLC35F3
Tian, 2006	rs7575147	2	SLC4A5
Tian, 2006	rs7689609	4
Tian, 2006	rs7788641	7	NFE2L3
Tian, 2006	rs7810554	7	TNFA
Tian, 2006	rs798443	2
Tian, 2006	rs8113143	19	WDR88
Tian, 2006	rs833282	3	SOX2OT
Tian, 2006	rs857440	6
Tian, 2006	rs870272	9
Tian, 2006	rs9306906	4
Tian, 2006	rs9416026	10	CBARA1
Tian, 2006	rs9416972	10	ZEB1
Tian, 2006	rs9530646	13	MYCBP2
Tian, 2006	rs9543532	13	KFL12
Tian, 2006	rs9849733	3
Tian, 2006	rs9923864	16	XYLT1
Reiner, 2005	rs146026	13		failed
Reiner, 2005	rs2228478	16	MC1R	failed
Reiner, 2005	rs594689	11	EFEMP2	failed
Tian, 2006	rs10028057	4		failed
Tian, 2006	rs10254729	7	ZNF498	failed
Tian, 2006	rs11652805	17		failed
Tian, 2006	rs12094678	1	PRDM16	failed
Tian, 2006	rs897351	18	L3MBTL4	failed
Tian, 2006	rs9297712	8	NSMCE2	failed
Tian, 2006	rs9525462	13	KBTBD7	failed
Tian, 2006	rs9806307	15	CYO11A1	failed
