# Supplementary material for: Dissecting the Within-Africa Ancestry of Populations of African Descent in the Americas
Source: PLOS journal article supplement (doi:10.1371/journal.pone.0014495), 2011-01-06
Supplement: S3 (10.1371/journal.pone.0014495.s003) [file journal.pone.0014495.s003]

**Table S1: List of publications and populations included into the database of mtDNA HVS I/II sequences.**

**Table S2: List of publications mined for NRY information.**

**Figure S1: Continental ancestry of European Americans and white Brazilians.**

**Table S3: Summary of estimates of continental ancestry presented in Figure 1 and Figure S1.**

**Table S4: Reported/Estimated vs. Calculated World admixture proportions.**

**Table S5: Geographically sorted African portion of mtDNA database.**

**Figure S2: MDS clustering of W/WC Africa divided by geography.**

**Figure S3: MDS clustering of W/WC Africa divided by languages.**

**Figure S4: MDS clustering of W/WC Africa divided by major ethnic groups.**

**Figure S5: MDS clustering of W/WC Africa divided by groups based on ethnical and language group affiliation.**

**Figure S6: Map of Africa with source W/WC, SW/WC Bantu, and SE African populations and their contribution to the admixed populations of São Tomé e Príncipe and Cabo Verde.**

**Table S6: The relative contribution of African regions to the admixed populations of the Americas and Africa.**

**Table S7: Relative contribution of African regions to the admixed populations as represented in Figure 3b.**

**Figure S7: MDS plot of Senegalese and Philadelphia African Americans based on AIMs.**

**Table S8: LnP(D) for STRUCTURE admixture estimate runs assuming 1-5 populations (K=1-5).**

**Text S1: Detailed description of mtDNA database, grouping of African ethnic groups, the historical context for African/American populations, and admixture analysis using ADMIX.**

**References S1**

**Table S1: List of publications and populations included into the database of mtDNA HVS I/II sequences.**

| Source                                       | Continent       | Region | Country            | Group                             | Admixed | n   | Relevance                                                                                                 |
|----------------------------------------------|-----------------|--------|--------------------|-----------------------------------|---------|-----|-----------------------------------------------------------------------------------------------------------|
| Allard 2005 [1]                              | <b>Americas</b> | N      | USA                | African Americans                 | Admixed | 765 | Forensic database of African Americans in USA                                                             |
| Alves-Silva 2000 [2]                         | <b>Americas</b> | S      | Brazil             | Population of Brazil              | Admixed | 247 | South American admixed population (mainly white)                                                          |
| Benn Torres 2007 [3]                         | <b>Americas</b> | C      | Caribbean          | African-Caribbeans                | Admixed | 313 | Comparing African-descended Americans (1 sample omitted)                                                  |
| Ely 2006 [4]                                 | <b>America</b>  | N      | USA                | Gullah/Geechee                    | Admixed | 78  | Comparing African-descended Americans                                                                     |
| Gonçalves 2008 [5]                           | <b>Americas</b> | S      | Brazil             | Black Brazilians (São Paulo)      | Admixed | 120 | Comparing African-descended Americans                                                                     |
| Guerreiro Jr. 2009 [6]                       | <b>America</b>  | S      | Brazil             | White Brazilians                  | Admixed | 171 | Comparing European-descended Americans                                                                    |
| Hünemeier 2007 [7]<br>Guerreiro Jr. 2009 [6] | <b>Americas</b> | S      | Brazil             | Black Brazilians (Porto Alegre)   | Admixed | 107 | Comparing African-descended Americans (Hünemeier reports African, Guerreiro adds European/Amerindian Hgs) |
| Hünemeier 2007 [7]                           | <b>Americas</b> | S      | Brazil             | Black Brazilians (Rio de Janeiro) | Admixed | 84  | African (L) Hgs only                                                                                      |
| Mendizabal 2008 [8]                          | <b>Americas</b> | C      | Cuba               | Population of Cuba                | Admixed | 245 | Central American admixed population                                                                       |
| Salas 2008 [9]                               | <b>Americas</b> | S      | Colombia           | Afro-Colombians                   | Admixed | 95  | Comparing African-descended Americans                                                                     |
| Sans 2006 [10]                               | <b>Americas</b> | S      | Uruguay            | Population of Uruguay             | Admixed | 43  | General population of Uruguay                                                                             |
| Silva 2006 [11]                              | <b>Americas</b> | S      | Brazil             | Black Brazilians                  | Admixed | 50  | Comparing African-descended Americans                                                                     |
| Stefflova 2009 [12]                          | <b>Americas</b> | N      | USA                | African Americans                 | Admixed | 217 | Philadelphia African Americans                                                                            |
| Stefflova 2009 [12]                          | <b>Americas</b> | N      | USA                | European-Americans                | Admixed | 204 | Philadelphia European-Americans                                                                           |
| Beleza 2005 [13]                             | <b>Africa</b>   | SW     | Angola             | Bantu speakers                    | Native  | 110 | People of Cabinda, Bantu expansion                                                                        |
| Brandstätter 2004 [14]                       | <b>Africa</b>   | E      | Kenya              | not reported                      | Native  | 93  | Population of Nairobi                                                                                     |
| Brehm 2002 [15]                              | <b>Africa</b>   | W      | Cabo Verde         | Population of Cabo Verde          | Admixed | 291 | Displaced from Africa by Portuguese                                                                       |
| Černý 2004 [16]                              | <b>Africa</b>   | WC     | N Cameroon         | Chadic speakers                   | Native  | 103 | Chadic speakers of E origin in WC Africa                                                                  |
| Černý 2006 [17]                              | <b>Africa</b>   | W      | Burkina Faso       | Fulbe                             | Native  | 97  | W African Fulbe                                                                                           |
| Černý 2006 [17]                              | <b>Africa</b>   | C/WC   | N Cameroon, S Chad | Fulbe                             | Native  | 87  | C Africa Fulbe                                                                                            |
| Černý 2007 [18]                              | <b>Africa</b>   | WC     | Cameroon           | Fali, Kotoko, Masa                | Native  | 79  | Chadic and non-Bantu WC                                                                                   |
| Černý 2007 [18]                              | <b>Africa</b>   | C      | Chad               | Arabs and Kanenbu                 | Native  | 77  | Semitic and Nilo-Sah. WC                                                                                  |
| Černý 2007 [18]                              | <b>Africa</b>   | WC     | Niger              | Buduma                            | Native  | 30  | Chadic WC                                                                                                 |
| Černý 2007 [18]                              | <b>Africa</b>   | WC     | Nigeria            | Kanuri and Arabs                  | Native  | 69  | Nilo-Saharan, Semitic WC                                                                                  |

|                                                     |               |      |                      |                                             |         |     |                                                    |
|-----------------------------------------------------|---------------|------|----------------------|---------------------------------------------|---------|-----|----------------------------------------------------|
| Chen 2000 [19]                                      | <b>Africa</b> | S    | South Africa         | Khoisan speakers                            | Native  | 74  | Khoisan hunter gatherers                           |
| Coia 2005 [20] (includes Destro-Bisol 2004 samples) | <b>Africa</b> | WC   | Cameroon             | Population of Cameroon                      | Native  | 440 | Bantu and non-Bantu population of S and N Cameroon |
| Destro-Bisol 2004 [21]                              | <b>Africa</b> | C    | CAR                  | Mbenzele Pygmies                            | Native  | 57  | C African Hunter-gatherers                         |
| Ely 2006 [4]                                        | <b>Africa</b> | W    | Mali                 | Bambara and Malinke                         | Native  | 80  | Bambara and Malinke ethnic groups of Mali          |
| González 2006 [22]                                  | <b>Africa</b> | W    | Mali                 | Multiple                                    | Native  | 124 | Variation in Mali pop.                             |
| González 2006 [22] (includes Rando 1998 samples)    | <b>Africa</b> | NW   | Mauritania           | Semitic speakers                            | Native  | 64  | Semitic speakers of NW                             |
| Jackson 2005 [23]                                   | <b>Africa</b> | W    | Sierra Leone         | Loko, Limba, Temne, Mende                   | Native  | 277 | W Africa ethnic groups                             |
| Kivisild 2004 [24]                                  | <b>Africa</b> | E    | Ethiopia, Eritrea    | Variation in E Africa                       | Native  | 270 | E Africa Afro-Asiatic speakers                     |
| Mateu 1997 [25]                                     | <b>Africa</b> | WC   | Equat. Guinea        | Bubi                                        | Native  | 45  | WC coast island inhabited by pre-colonial Africans |
| Mateu 1997 [25]                                     | <b>Africa</b> | WC   | São Tomé e Príncipe  | -                                           | Admixed | 50  | Displaced from Africa by Portuguese                |
| Pereira 2001 [26]                                   | <b>Africa</b> | SE   | Mozambique           | Bantu speakers                              | Native  | 109 | Bantu-speaking SE Afr.                             |
| Plaza 2004 [27]                                     | <b>Africa</b> | SW   | Angola               | Mbundu                                      | Native  | 44  | Source of Brazilian AAs                            |
| Quintana-Murci 2008 [28]                            | <b>Africa</b> | WC/C | Cameroon, Gabon, CAR | Babongo, Baka, Bakola, Bakoya, Biaka, Tigar | Native  | 382 | West Pygmies                                       |
| Quintana-Murci 2008 [28]                            | <b>Africa</b> | C    | DRC                  | Mbuti                                       | Native  | 39  | East Pygmies                                       |
| Quintana-Murci 2008 [28]                            | <b>Africa</b> | WC   | Gabon, Cameroon      | Bantu speakers                              | Native  | 983 | Bantu speakers of WC Africa                        |
| Rando 1998 [29]                                     | <b>Africa</b> | N    | Morocco              | Berber                                      | Native  | 92  | N Africans, mainly Berber                          |
| Rando 1998 [29]                                     | <b>Africa</b> | NW   | West Sahara          | Semitic speakers                            | Native  | 25  | NW Africans                                        |
| Rando 1998 [29]                                     | <b>Africa</b> | W    | Senegal              | multiple                                    | Native  | 121 | Population of Senegal                              |
| Richards 2000 [30]                                  | <b>Africa</b> | NE   | Egypt, Sudan         | Egyptian, Nubian                            | Native  | 147 | NE Africans                                        |
| Rosa 2004 [31]                                      | <b>Africa</b> | W    | Guinea-Bissau        | multiple                                    | Native  | 372 | Population of Guinea-Bissau                        |
| Salas 2002 [32]                                     | <b>Africa</b> | SE   | Mozambique           | Bantu speakers                              | Native  | 308 | Population of SE Africa                            |
| Silva 2006 [11]                                     | <b>Africa</b> | C/WC | DRC, Cameroon        | Bantu speakers                              | Native  | 20  | WC and C Africa Bantu speakers                     |
| Stevanovitch 2004 [33]                              | <b>Africa</b> | NE   | Egypt                | Egyptian                                    | Native  | 58  | NE Africans                                        |
| Stefflova 2009 [12]                                 | <b>Africa</b> | W    | Senegal              | multiple                                    | Native  | 49  | Population of Senegal                              |
| Trovoada 2004 [34]                                  | <b>Africa</b> | WC   | São Tomé e Príncipe  | Angolares, Forros, Tongas                   | Admixed | 103 | Displaced from Africa by Portuguese                |
| Watson 1997 [35] (from Vigilant 1991)               | <b>Africa</b> | S    | Botswana             | !Kung                                       | Native  | 19  | Khoisan speakers                                   |
| Watson 1997 [35] (from Watson 1996)                 | <b>Africa</b> | E    | Somalia, Kenya       | Kikuyu, Somali, Turkana                     | Native  | 88  | E Africans                                         |

|                                                       |                          |       |                                               |                      |        |      |                                       |
|-------------------------------------------------------|--------------------------|-------|-----------------------------------------------|----------------------|--------|------|---------------------------------------|
| Watson 1997 [35] (from Vigilant 1991)                 | <b>Africa</b>            | C     | CAR, DRC                                      | Mbuti, Biaka Pygmies | Native | 30   | West and East African Pygmies         |
| Watson 1997 [35] (from Vigilant 1991 and Watson 1996) | <b>Africa</b>            | WC    | Niger, Nigeria                                | multiple             | Native | 160  | W and WC Africans                     |
| Watson 1997 [35] (from Graven 1995)                   | <b>Africa</b>            | W     | Senegal                                       | Mandenka             | Native | 110  | W African Mandenka                    |
| Kivisild 2004 [24]                                    | <b>Arabian Peninsula</b> | -     | Kuwait                                        | Yemeni               | Native | 115  | Transition between Africa and Eurasia |
| Richards 2000 [30]                                    | <b>Arabian Peninsula</b> | -     | multiple                                      | Semitic speakers     | Native | 418  | Transition between Africa and Eurasia |
| Fagundes 2008 [36]                                    | <b>Americas</b>          | S & N | multiple                                      | Native Americans     | Native | 57   | Native Americans                      |
| Li 2007 [37]                                          | <b>Asia</b>              | SE    | China, Vietnam                                | Asians               | Native | 889  | Asians                                |
| Malyarchuk 2003 [38]                                  | <b>Europe</b>            | SE    | States of former Yugoslavia                   | Europeans            | Native | 248  | Europeans                             |
| Richards 2000 [30]                                    | <b>Europe</b>            | All   | Multiple                                      | Europeans            | Native | 2802 | Europeans                             |
| Richards 2000 [30]                                    | <b>Eurasia/Asia</b>      | W     | Iran, Armenia, N Caucasus, Azerbaijan, Turkey | -                    | Native | 730  | Eurasia                               |

**Table S2: List of publications mined for NRY information.**

| Source                 | Continent       | Region | Country                 | Group                                 | Admixed | n    | Relevance                                                         |
|------------------------|-----------------|--------|-------------------------|---------------------------------------|---------|------|-------------------------------------------------------------------|
| Brion 2005 [39]        | <b>Americas</b> | S      | Colombia, Argentina     | mixed                                 | Admixed | 141  | Admixed population of South America                               |
| Gonçalves 2008 [5]     | <b>Americas</b> | S      | Brazil                  | AA                                    | Admixed | 120  | Admixed population of Brazil                                      |
| Guerreiro Jr. 2009 [6] | <b>Americas</b> | S      | Brazil                  | AA, EA                                | Admixed | 257  | Population of Brazil                                              |
| Hammer 2006 [40]       | <b>Americas</b> | N      | USA                     | AA, NA, HA, EA, SA*                   | Admixed | 2517 | All US admixed populations                                        |
| Hünemeier 2007 [7]     | <b>Americas</b> | S      | Brazil                  | Black Brazilians (Rio de Janeiro)     | Admixed | 187  | African Brazilians with partial information of European variation |
| Mendizabal 2008 [8]    | <b>Americas</b> | C      | Cuba                    | mixed                                 | Admixed | 132  | Admixed population of Central America                             |
| Silva 2006 [41]        | <b>Americas</b> | S      | Brazil                  | mixed                                 | Admixed | 127  | Population of Brazil                                              |
| Stefflova 2009 [12]    | <b>Americas</b> | N      | USA (Philadelphia)      | African Americans, European-Americans | Admixed | 389  | Admixed populations of USA                                        |
| Vallone 2004 [42]      | <b>Americas</b> | N      | USA                     | African Americans, European-Americans | Admixed | 229  | Admixed populations of USA                                        |
| Gonçalves 2005 [43]    | <b>Islands</b>  | NW     | Acores                  | mixed                                 | Admixed | 121  | Admixed population off the coast of Africa                        |
| Gonçalves 2005 [43]    | <b>Islands</b>  | NW     | Madeira                 | mixed                                 | Admixed | 129  | Admixed population off the coast of Africa                        |
| Gonçalves 2007 [44]    | <b>Islands</b>  | WC     | São Tomé e Príncipe     | multiple                              | Admixed | 150  | Admixed populations of Africa                                     |
| Beleza 2005 [13]       | <b>Africa</b>   | SW     | Angola/Cabinda          | mixed                                 | Native  | 74   | Variation of Cabinda                                              |
| Brion 2005 [39]        | <b>Africa</b>   | E/SE   | Somalia, Mozambique     | mixed                                 | Native  | 235  | Variation of E/SE Africa                                          |
| Cruciani 2002 [45]     | <b>Africa</b>   | WC     | Cameroon                | multiple                              | Native  | 241  | Variation of Cameroon                                             |
| Cruciani 2002 [45]     | <b>Africa</b>   | C      | C.A.R., D.R.C.          | Biaka, Mbuti, Lissongo                | Native  | 36   | Pygmy populations                                                 |
| Cruciani 2002 [45]     | <b>Africa</b>   | W      | Burkina Faso            | Fulbe, Mossi, Rimaibe                 | Native  | 106  | Variation of Burkina Faso                                         |
| Cruciani 2002 [45]     | <b>Africa</b>   | S      | South Africa            | !Kung, Khwe                           | Native  | 90   | Khoisan speakers                                                  |
| Cruciani 2002 [45]     | <b>Africa</b>   | N, E   | Morocco, Ethiopia       | Arabs, Berbers, Jews                  | Native  | 135  | Semitic speakers                                                  |
| Luis 2004 [46]         | <b>Africa</b>   | N      | Egypt                   | Arabs                                 | Native  | 147  | Variation of Egypt                                                |
| Luis 2004 [46]         | <b>Africa</b>   | E      | Rwanda, Kenya, Tanzania | Bantu, Hutu, Tutsi, Wairak            | Native  | 235  | Variation of East Africa                                          |
| Luis 2004 [46]         | <b>Africa</b>   | WC/W   | Cameroon, Benin         | Bamileke, Bantu, Fon                  | Native  | 199  | WC/W Africa                                                       |
| Robino 2007 [47]       | <b>Africa</b>   | N      | Algeria                 | Arabs                                 | Native  | 102  | Variation of North Africa                                         |

|                     |                          |      |                                   |                                                                     |        |     |                            |
|---------------------|--------------------------|------|-----------------------------------|---------------------------------------------------------------------|--------|-----|----------------------------|
| Rosa 2007 [48]      | <b>Africa</b>            | W    | Guinea-Bissau                     | Niger-Congo speakers                                                | Native | 282 | West African variation     |
| Tishkoff 2007 [49]  | <b>Africa</b>            | E/WC | Tanzania, Nigeria                 | Hadza, Sandawe, Yoruba, Turu, Mbugwe, Datog, Burunge                | Native | 232 | Variation of Tanzania      |
| Wood 2005 [50]      | <b>Africa</b>            | E    | Ethiopia, Uganda, Tanzania, Kenya | Amhara, Ganda, Kikuyu, Luo, Maasai, Oromo, etc                      | Native | 159 | Variation of E Africa      |
| Wood 2005 [50]      | <b>Africa</b>            | C    | D.R.C., C.A.R.                    | Alur, Baka, Biaka, Hema, Mbuti, Nande                               | Native | 141 | Variation of C Africa      |
| Wood 2005 [50]      | <b>Africa</b>            | S    | South Africa, Namibia, Zimbabwe   | !Kung, Ambo, Dama, Herero, Nama, Shona, Sotho, Tsumkwe, Zhosa, Zulu | Native | 322 | Variation of S Africa      |
| Wood 2005 [50]      | <b>Africa</b>            | WC   | Cameroon                          | multiple                                                            | Native | 161 | Variation of Cameroon      |
| Wood 2005 [50]      | <b>Africa</b>            | W    | Mali, Ghana, Senegal/Gambia       | Dogon, Ewe, Fante, Ga, Mandenka, Wolof                              | Native | 219 | Variation of W Africa      |
| Wood 2005 [50]      | <b>Africa</b>            | N    | Egypt, Tunisia                    | mixed                                                               | Native | 120 | Variation of N Africa      |
| Rosa 2007 [48]      | <b>Africa</b>            | W    | Guinea-Bissau                     | Balanta, Bijagos, Felupe, Fulbe, Mandenka, Nalu, Papel              | Native | 282 | Variation of Guinea Bissau |
| Luis 2004 [46]      | <b>Arabian Peninsula</b> |      | Oman                              | Arabs                                                               | Native | 121 | En route out of Africa     |
| Brion 2005 [39]     | <b>Europe</b>            | W/SW | Germany, Denmark, Galicia         | mixed                                                               | Native | 430 | Variation of W Europe      |
| Gonçalves 2005 [43] | <b>Europe</b>            | SW   | Portugal                          | mixed                                                               | Native | 303 | Variation of SW Europe     |
| Brion 2005 [39]     | <b>Eurasia</b>           | W    | Turkey                            | mixed                                                               | Native | 51  |                            |
| Brion 2005 [39]     | <b>Asia</b>              | SE/E | China, Japan, Thailand            | mixed                                                               | Native | 179 | Variation of SE/E Asia     |
| Brion 2005 [39]     | <b>Greenland</b>         |      |                                   | mixed                                                               |        | 90  |                            |

\*AA=African Americans, EA=European-Americans, NA=Native-Americans, HA=Hispanic-Americans, SA=Asian-Americans

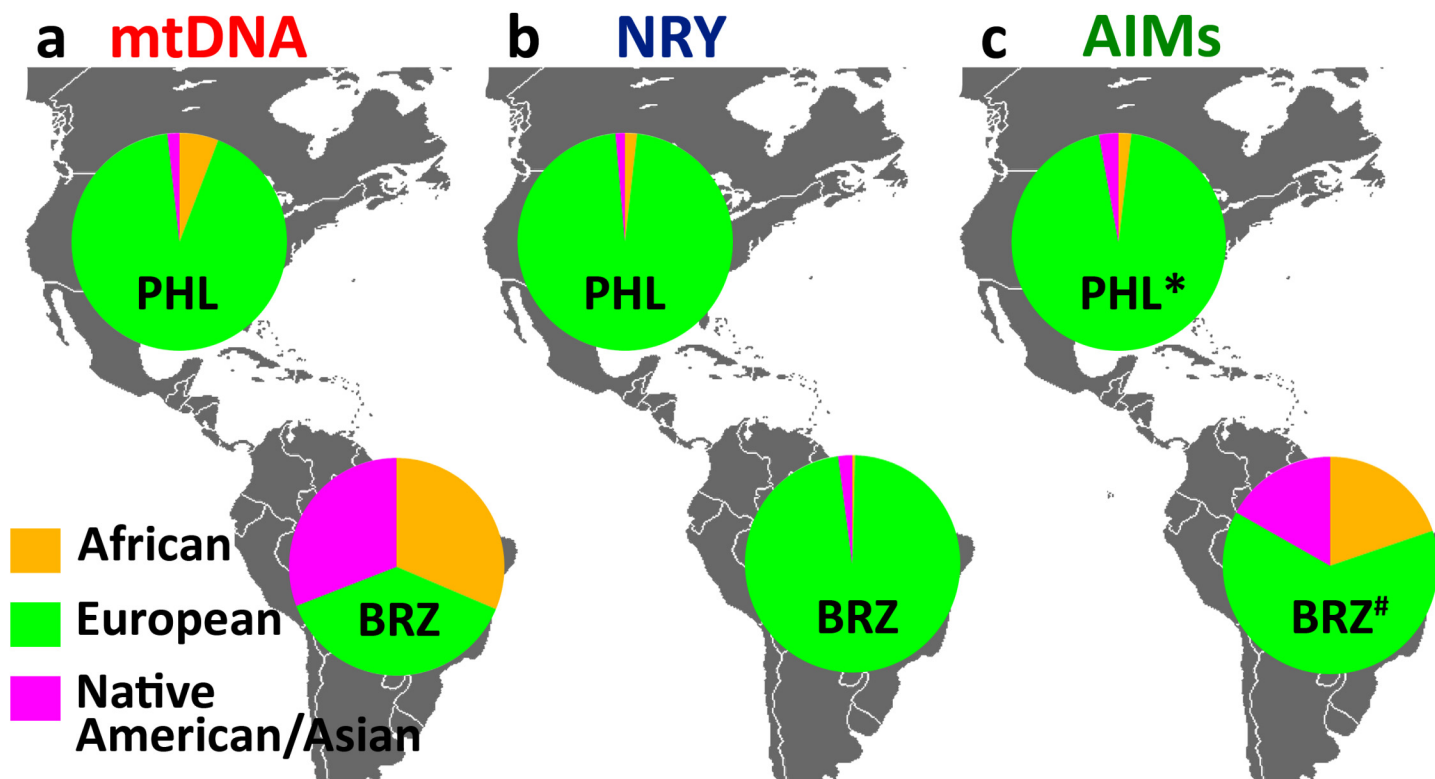

**Figure S1: Continental ancestry of European Americans and white Brazilians** estimated using: **a)** mitochondrial DNA, **b)** Y-chromosome, (reflecting maternal and paternal admixture, respectively), **c)** Ancestry Informative Markers (reflecting the autosomal genome) showing the relative ratio of the three world populations that significantly contributed to the admixed populations of Philadelphia and Brazil. This figure complements **Figure 1**, showing significantly higher admixture in South America that is strongly sex-biased. (Note: \* designates samples that were typed and analyzed by authors, # designates previously published estimates and the remaining sample sets (mtDNA and NRY of European Americans from Philadelphia and white Brazilians) were collected from literature as a raw data (see comprehensive databases in **File S1** and **File S2**) and analyzed by authors).

**Table S3: Summary of estimates of continental ancestry presented in Figure 1 and Figure S1** assessed by: 1) typing and analyzing using STRUCTURE program (“type+structure”) or 2) literature mining of the mtDNA-, NRY-, and AIMs-based estimates (“published”) or 3) assembling the raw mtDNA/NRY data that were subjected to admixture analysis (“admix”) using our comprehensive database for defining the parental populations (if multiple references were used, samples were first pooled and then analyzed as a single group). Values are reported as relative contribution from African, W Eurasian (mtDNA/NRY) or European (AIMs) and Native American (mtDNA/NRY) or Native American/SE Asian populations (AIMs\*, except in [51] reporting Native American ancestry only)  $\pm$  SE (which is defined as sampling error for “admix”, standard error for “published” (if reported) and pseudo-standard error for “type+structure” where  $pSE = [1/2 (\sum PI)]/1.645$ ). For those cases where we estimated mtDNA/NRY-based admixture using “admix”, we had to define the ancestral African, European and Native American/Asian parental populations. The details of which populations were included in the mtDNA analysis can be found in **Text S1**. For NRY, simply all populations from **Table S2** with designation in column “Continent”: *European/African/Asian* and “Admixed”: *Native* were used. The details of “type+structure” methods, including the description of parental populations, is listed in Methods section under “Autosomal AIMs”.

| Region       | Markers | N   | Americans of African descent |                 |                 | N   | Americans of European descent |                 |                 | Lit. (analysis or published estimates) |
|--------------|---------|-----|------------------------------|-----------------|-----------------|-----|-------------------------------|-----------------|-----------------|----------------------------------------|
|              |         |     | African                      | European        | Nat.Am./As.     |     | African                       | European        | Nat.Am./As.     |                                        |
| Brazil       | mtDNA   | 277 | 85% $\pm$ 3.4                | 1.4% $\pm$ 1    | 13.6% $\pm$ 3.2 | 247 | 30.7% $\pm$ 6                 | 38.4% $\pm$ 5   | 30.9% $\pm$ 4.6 | [5,7,11]/ [2] (admix)                  |
|              | NRY     | 182 | 51.3% $\pm$ 4                | 46.8% $\pm$ 4   | 1.8% $\pm$ 1.9  | 203 | 0.4% $\pm$ 1                  | 97.4% $\pm$ 2   | 2.1% $\pm$ 1.8  | [5,6]/ [6] (admix)                     |
|              | AIMs    | 499 | 57.6%                        | 30.4%           | 12.4%           | 308 | 19.8%                         | 63.5%           | 16.8%           | [53,6] (published)                     |
| Caribbean    | mtDNA   | 313 | 90.3% $\pm$ 2.4              | 4.3% $\pm$ 1.8  | 5.3% $\pm$ 1.7  | -   | -                             | -               | -               | [3] (admix)                            |
|              | NRY     | 354 | 73%                          | 27%             | -               | -   | -                             | -               | -               | [3] (published)                        |
|              | AIMs    | 298 | 87.3% $\pm$ 2.4              | 10.8% $\pm$ 2.6 | 1.9% $\pm$ 2.4  | -   | -                             | -               | -               | [52] (published)                       |
| Philadelphia | mtDNA   | 217 | 90.1% $\pm$ 2.9              | 8.8% $\pm$ 2.8  | 1.1% $\pm$ 0.8  | 204 | 5.8% $\pm$ 5                  | 92.4% $\pm$ 7   | 1.8% $\pm$ 1    | [12] (admix)                           |
|              | NRY     | 199 | 67.5% $\pm$ 4                | 31.2% $\pm$ 4   | 1.3% $\pm$ 1.5  | 190 | 1.8% $\pm$ 1                  | 96.7% $\pm$ 2   | 1.4% $\pm$ 1    | [12] (admix)                           |
|              | AIMs*   | 331 | 79.1% $\pm$ 2.8              | 16.3% $\pm$ 3.1 | 4.6% $\pm$ 3.4  | 728 | 1.9% $\pm$ 1.5                | 95.2% $\pm$ 3.3 | 2.9% $\pm$ 3.2  | (type+structure)                       |
| USA          | mtDNA   | 765 | 93.1% $\pm$ 1.2              | 5.2% $\pm$ 1.4  | 1.7% $\pm$ 0.6  | -   | -                             | -               | -               | [1] (admix)                            |
|              | NRY     | 653 | 76.5% $\pm$ 2                | 24.5% $\pm$ 2   | 0               | -   | -                             | -               | -               | [40] (admix)                           |
|              | AIMs    | 50  | 83.0% $\pm$ 1.6              | 14.7% $\pm$ 1.8 | 2.3% $\pm$ 0.5  | -   | -                             | -               | -               | [51] (published)                       |
|              |         |     | Africans                     |                 |                 |     |                               |                 |                 |                                        |
| Senegal      | AIMs*   | 205 | 94.9% $\pm$ 1.7              | 2.9% $\pm$ 1.5  | 2.2% $\pm$ 2    | -   | -                             | -               | -               | (type+structure)                       |
| Nigeria      | AIMs    | 40  | 95.1% $\pm$ 1.1              | 3.65% $\pm$ 1.1 | 1.25% $\pm$ 0.4 | -   | -                             | -               | -               | [51] (published)                       |



**Table S4: Reported/Estimated vs. Calculated World admixture proportions.** Average group admixture proportions estimated using ancestry informative markers (AIMs) for US populations (Yeager 2008 [51]), Caribbean Islands (Ben-Torres 2008 [52], using WLS method (upper) and ML method (lower)), Brazil (Salzano & Bortolini 2002 [53]) and Philadelphia (Stefflova 2009 [12]) compared to the “calculated” values, obtained by averaging the mtDNA and NRY contribution ( $m_{AIMs} = \frac{1}{2} m_{mtDNA} + \frac{1}{2} m_{NRY}$ ) from **Table S3**. Despite the reported and calculated values are very similar, Native American/Asian contribution is over-estimated for populations with < 5% of the “true” contribution. This is most likely due to two factors: 1) uncertainty in predicting low levels of admixture from population that has a significant overlap of variation in chosen AIMs with the European population, 2) difference in definition of source populations, where mtDNA and NRY estimates separate the Native American and group Europe and West Asia whereas our AIMs-based estimates group SE Asians with Native Americans. Also, the reported admixture proportions for Brazilian populations are slightly different from the calculated values, probably due to low number of typed AIMs as well as sampling of diversely admixed population for mtDNA and NRY vs. AIMs reports.

| Descent            | Geography    | Reported |        |           | Calculated from mtDNA+NRY |           |        |
|--------------------|--------------|----------|--------|-----------|---------------------------|-----------|--------|
|                    |              | Africa   | Europe | N.Amer/As | Africa                    | W Eurasia | N.Amer |
| primarily African  | USA          | 83.0%    | 14.7%  | 2.3%      | 84.5%                     | 14.7%     | 0.8%   |
|                    | Philadelphia | 79.1%    | 16.3%  | 4.6%      | 78.8%                     | 20%       | 1.2%   |
|                    | Caribbean    | 82.3%    | 12.7%  | 5%        | 81.7%                     | 15.7%     | 2.6%   |
|                    |              | 87.3%    | 10.8%  | 1.9%      |                           |           |        |
|                    | Brazil       | 57.6%    | 30.4%  | 12.4%     | 67.4%                     | 24.7%     | 7.9%   |
| primarily European | Philadelphia | 1.9%     | 95.2%  | 2.9%      | 3.8%                      | 94.6%     | 1.6%   |
|                    | Brazil       | 19.8%    | 63.5%  | 16.8%     | 15.6%                     | 67.9%     | 16.5%  |

**Table S5: Geographically sorted African portion of mtDNA database.**

| Group              | Geo. region | Ethnic group (n)                           | Country                                                               | Language                        | n   | Source                                                                                                                      |
|--------------------|-------------|--------------------------------------------|-----------------------------------------------------------------------|---------------------------------|-----|-----------------------------------------------------------------------------------------------------------------------------|
| <b>West Pygmy</b>  | WC          | Baka (127), Bakola (88), Tigar (35)        | Cameroon                                                              | Bantu and non-Bantu Volta-Congo | 250 | Quintana-Murci 2008 [28]                                                                                                    |
|                    | WC          | Babongo (45), Bakoya (31)                  | Gabon                                                                 | ?                               | 76  | Quintana-Murci 2008 [28]                                                                                                    |
|                    | C           | Biaka (73), Mbenzele (57)                  | C.A.R.                                                                | Bantu                           | 130 | Quintana-Murci 2008 [28], Watson 1997 [35], Destro-Bisol 2004° [21]                                                         |
| <b>Khoisan</b>     | S           | !Kung (62), Kwe (31)                       | Botswana, South Africa                                                | Khoisan                         | 93  | Chen 2000 [19], Watson 1997 [35]                                                                                            |
| <b>East Pygmy</b>  | C           | Mbuti (52)                                 | D.R.C                                                                 | Nilo-Saharan                    | 52  | Quintana-Murci 2008 [28], Watson 1997 [35]                                                                                  |
| <b>N Africa</b>    | NW          | Berber (60), other (32)                    | Morocco                                                               | Afro-Asiatic                    | 92  | Rando 1998 [29]                                                                                                             |
| <b>E/SE Africa</b> | SE          | Bantu speakers                             | Mozambique*                                                           | Bantu                           | 417 | Pereira 2001 [26], Salas 2002 [32]                                                                                          |
|                    | E           | Turkana (37), Kikuyu (24), other (93)      | Kenya                                                                 | Nilo-Saharan, Bantu, ?          | 154 | Brandstätter 2004 [14], Watson 1997 [35]                                                                                    |
| <b>NE/E Africa</b> | E           | Tigrai (45 and 8)                          | Ethiopia, Eritrea                                                     | Semitic**                       | 53  | Kivisild 2004 [24]                                                                                                          |
|                    | E           | Somali (27)                                | Somalia                                                               | Cushistic**                     | 27  | Watson 1997 [35]                                                                                                            |
|                    | E           | Amhara (120), other (97)                   | Ethiopia                                                              | Afro-Asiatic                    | 217 | Kivisild 2004 [24]                                                                                                          |
|                    | NE          | Egyptian                                   | Egypt                                                                 | Afro-Asiatic                    | 125 | Stevanovitch 2003 [33], Richards 2000 [30]                                                                                  |
|                    | NE          | Nubian                                     | Sudan                                                                 | Nilo-Saharan                    | 80  | Richards 2000 [30]                                                                                                          |
| <b>WC/SW Bantu</b> | SW          | Mbundu (44), other (110)                   | Angola-Cabinda                                                        | Bantu                           | 154 | Beleza 2005 [13], Plaza 2004 [27]                                                                                           |
|                    | WC          | Bakaka (50), Bamileke (48), Bassa (46)     | Cameroon                                                              | Bantu                           | 144 | Coia 2005 [20]                                                                                                              |
|                    | WC          | Ewondo (78)                                | Cameroon                                                              | Bantu                           | 78  | Quintana-Murci 2008 [28], Coia 2005 [20]                                                                                    |
|                    | WC          | Fang (39), Ngumba (88), other (10)         | Cameroon                                                              | Bantu                           | 137 | Quintana-Murci 2008 [28], Silva 2006 [11]                                                                                   |
|                    | WC          | multiple (17 groups)                       | Gabon                                                                 | Bantu                           | 831 | Quintana-Murci 2008 [28]                                                                                                    |
|                    | WC          | Bubi of Bioko island                       | Equator. Guinea                                                       | Bantu                           | 45  | Mateu 1997 [25]                                                                                                             |
|                    | C           | Bantu speakers                             | D.R.C.                                                                | Bantu                           | 10  | Silva 2006 [11]                                                                                                             |
|                    | W/W C/C     | <b><i>Fulbe, Peul, Poular, Tukolor</i></b> | Burkina Faso, Nigeria, Cameroon N, Guinea-Bissau, Mali, Senegal, Chad | Atlantic N                      | 402 | Černý 2006 [17], Coia 2005 [20], Gonzales 2006 [22], Rando 1998 [29], Rosa 2004 [31], Stefflova 2009 [12], Watson 1997 [35] |
|                    | W           | <b><i>Balanta</i></b>                      | Guinea Bissau                                                         | Atlantic N                      | 63  | Rosa 2004 [31]                                                                                                              |
|                    | WC/C        | <b><i>Arabs</i></b> (Chad, Shuwa)          | Nigeria, Chad                                                         | Semitic                         | 65  | Černý 2007 [18]                                                                                                             |

|                                                               |                 |                                                                                 |                                                          |                                     |     |                                                                        |
|---------------------------------------------------------------|-----------------|---------------------------------------------------------------------------------|----------------------------------------------------------|-------------------------------------|-----|------------------------------------------------------------------------|
| <b>W/WC<br/>Africa<br/>(not<br/>Bantu or<br/>Pygmy)<br/>‡</b> | W               | <b><i>Bambara</i></b>                                                           | Mali, Senegal                                            | Mande                               | 79  | Gonzales 2006 [22], Ely 2006 [4], Rando 1998 [29], Stefflova 2009 [12] |
|                                                               | WC              | <b><i>Fali</i></b>                                                              | N Cameroon                                               | non-Bantu Volta                     | 81  | Černý 2007 [18], Coia 2005 [20]                                        |
|                                                               | C               | <b><i>Kanembu</i></b>                                                           | NW Chad                                                  | Nilo-Saharan                        | 50  | Černý 2007 [18]                                                        |
|                                                               | WC              | <b><i>Kanuri</i> Δ</b>                                                          | Niger, Nigeria                                           | Nilo-Saharan                        | 45  | Černý 2007 [18], Watson 1997 [35]                                      |
|                                                               | W               | <b><i>Limba</i></b>                                                             | Sierra Leone                                             | Atlantic S                          | 68  | Jackson 2005 [23]                                                      |
|                                                               | W               | <b><i>Malinke</i></b>                                                           | Mali, Senegal                                            | Mande                               | 93  | Ely 2006 [4], Gonzales 2006 [22], Rando 1998 [29]                      |
|                                                               | W               | <b><i>Mandenka</i></b>                                                          | Guinea-Bissau                                            | Mande                               | 142 | Rosa 2004 [31], Stefflova 2009 [12], Watson 1997 [35]                  |
|                                                               | W               | <b><i>Mende</i></b>                                                             | Sierra Leone                                             | Mande                               | 57  | Jackson 2005 [23]                                                      |
|                                                               | W               | <b><i>Temne</i></b>                                                             | Sierra Leone                                             | Atlantic S                          | 122 | Jackson 2005 [23]                                                      |
|                                                               | W               | <b><i>Wolof</i></b>                                                             | Senegal                                                  | Atlantic N                          | 59  | Rando 1998 [29], Stefflova 2009 [12]                                   |
|                                                               | W               | multiple†                                                                       | <b><i>Guinea-Bissau, Senegal</i></b>                     | <b><i>Atlantic N</i></b>            | 247 | Rando 1998 [29], Rosa 2004 [31], Stefflova 2009 [12]                   |
|                                                               | WC              | Hide (23), Kotoko (56), Mafa (31), Masa (32)                                    | <b><i>Cameroon (East origin)</i></b>                     | <b><i>Chadic</i></b>                | 142 | Černý 2004 [16], Černý 2007 [18]                                       |
|                                                               | WC              | Daba (20), Mandara (37), Podokwo (39), Uldeme (27)                              | <b><i>Cameroon (other)</i></b>                           | <b><i>Chadic</i></b>                | 123 | Coia 2005 [20]                                                         |
|                                                               | WC              | Buduma (30), Hausa (20)                                                         | <b><i>Niger</i></b>                                      | <b><i>Chadic</i></b>                | 50  | Černý 2007 [18], Watson 1997 [35]                                      |
|                                                               | W               | Soninke (11), Jancanca (1), Bobo (5), Loko (30), Sussu (8), Soce (1), 4 unknown | <b><i>Guinea-Bissau, Mali Senegal, Sierra Leone,</i></b> | <b><i>Mande</i></b>                 | 60  | Gonzales 2006 [22], Jackson 2005 [23], Rando 1998 [29], Rosa 2004 [31] |
|                                                               | W/W<br>C        | Dogon (6), Ivorienne (1), Senoufo (1), Tali (20), Tupuri (25), Yoruba (31)      | <b><i>Cameroon, Nigeria, Mali, Senegal</i></b>           | <b><i>non-Bantu Volta-Congo</i></b> | 86  | Coia 2005 [20], Gonzales 2006 [22], this paper, Watson 1997 [35]       |
|                                                               | NW/<br>WC/<br>W | Maure (2), Tuareg (25), W Saharan (25), unknown (65)                            | <b><i>Mauritania, Niger, W Sahara, Senegal</i></b>       | <b><i>Semitic/Berber</i></b>        | 116 | Gonzales 2006 [22], Rando 1998 [29], this paper, Watson 1997 [35]      |

\*Samples from Salas 2002 are mainly from Mozambique but also include samples from bordering neighbors, \*\* Semitic, Cushitic, Berberic and Chadic language groups all belong to Afro-Asiatic macro-language family, \*\*\* Bold-italic font indicates a group designation, Δ Kanuri were combined with overlapping samples from Cameroon with East origin, † Bainouk (1), Baiote (6), Banhu (1), Beafada (19), Bijagò (22), Brame (8), Cassanga (6), Diola (29), Landoma (1), Lebou (4), Manjaco (32), Mankanya (20), Mansonca (18), Nalu (26), Papel (23), Sahalle (1), Serer (30), ‡ Songhai/Sonrhail - Nilo-Saharan speakers of Nigeria and Mali (10+6) – were left out of the analysis

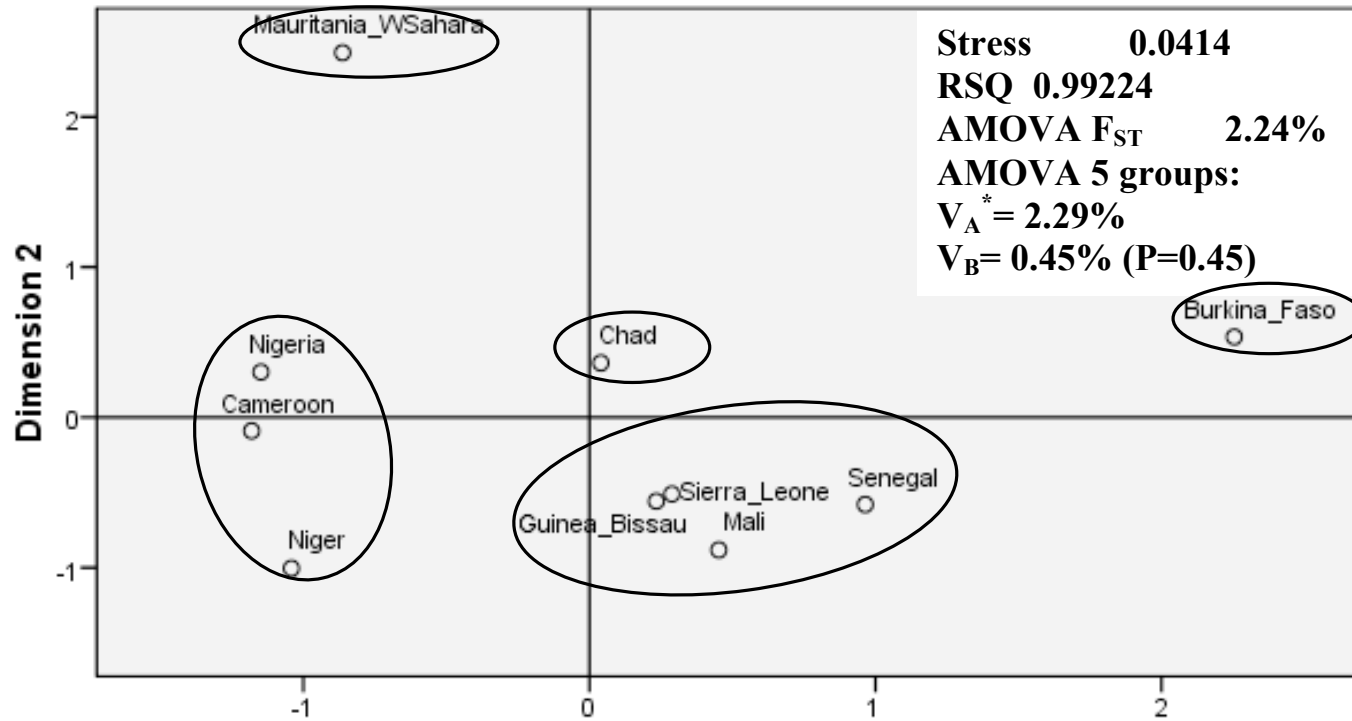

**Figure S2: MDS clustering of W/WC Africa divided by geography.** We first divided our mtDNA dataset of non-Bantu speaking and non-Pygmy populations of NW/W/WC/C Africa based on geographical location/political clusters into 10 countries: Burkina Faso, Cameroon “other”, Chad, Guinea-Bissau, Mali, Mauritania + Western Sahara, Niger, Nigeria, Senegal, and Sierra Leone. Guided by  $F_{ST}$  P values and SAMOVA, the mtDNA variation in these 10 states can be grouped into 5 clusters: 1) NW African Mauritania/Western Sahara, 2) Burkina Faso, 3) Nigeria clustered with Cameroon “other” and Niger, 4) W African Guinea-Bissau, Mali, Senegal, and Sierra Leone cluster, with 5) Chad being potentially grouped with these countries or the 5<sup>th</sup> group (with significant “among group variation”  $V_A$  contributing to 2.29% of total variation, and “among populations within groups”  $V_B$  contributing to 0.45% of total variation with  $p=0.45$ ).

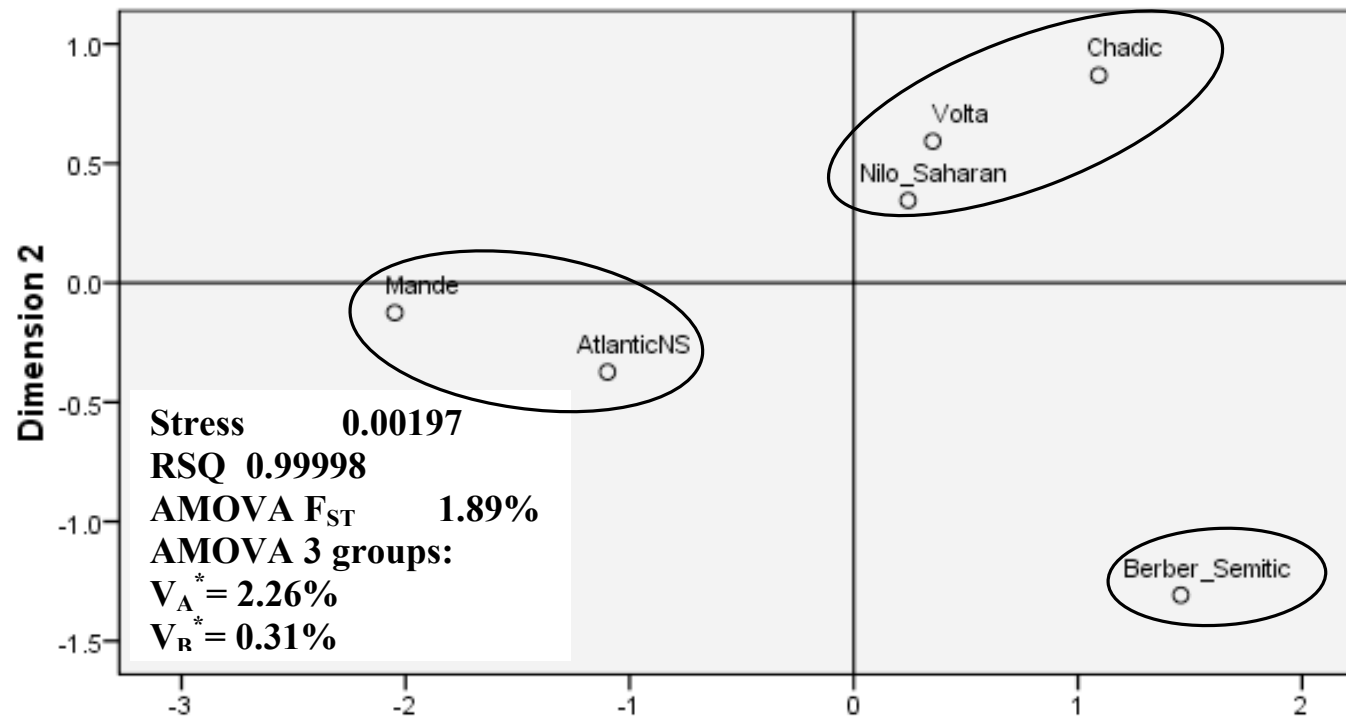

**Figure S3: MDS clustering of W/WC Africa divided by languages.** We next divided our mtDNA dataset of non-Bantu speaking and non-Pygmy populations of NW/W/WC/C Africa into 6 groups based on language affiliation: Afro-Asiatic speakers of Chadic (Cameroon, Niger) and Berber/Semitic (grouped because of low numbers and similarity; mainly from Mauritania and Nigeria) language groups, Nilo-Saharan speakers (mainly Chad and Nigeria), and Niger-Congo speakers of Atlantic South and North (majority belong to Fulbe), Mande and non-Bantoid Volta-Congo (mainly of Cameroon and Nigeria) sub-language groups. The mtDNA variation in these 6 sub-language groups can be grouped into 3 clusters: 1) Chadic + Nilo-Saharan + non-Bantoid Volta-Congo speakers, 2) Mande + Atlantic North and South, 3) Berber and Semitic speakers (with “among group variation”  $V_A$  contributing to 2.3% of total variation, and “among populations within groups”  $V_B$  contributing to 0.31% ( $P=0.01$ ) of total variation, both  $P<0.05$ ).

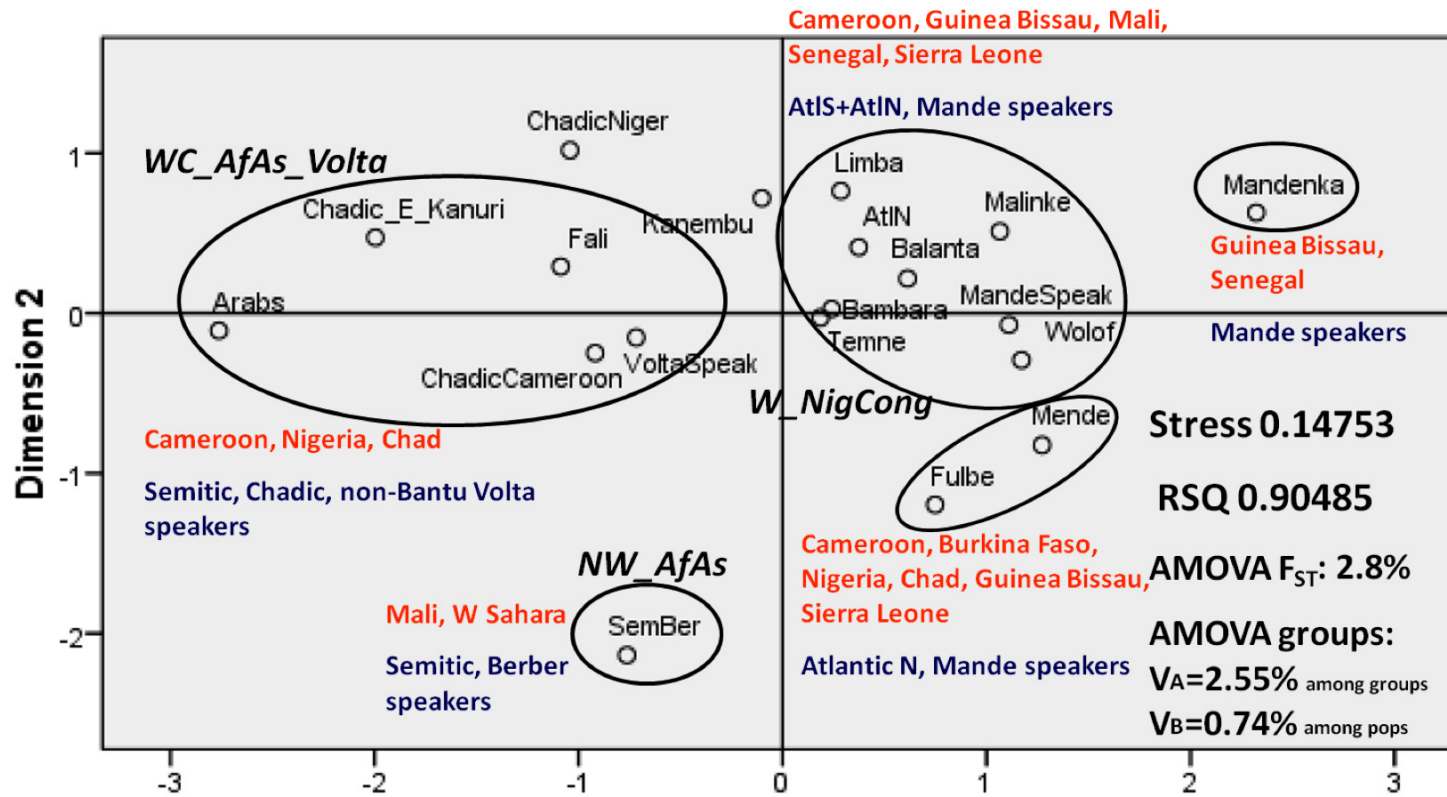

**Figure S4: MDS clustering of W/WC Africa divided by major ethnic groups.** We separated the mtDNA dataset of non-Bantu speaking and non-Pygmy populations of NW/W/WC/C Africa into 19 groups based on ethnicity as follows: single ethnic groups with sufficient ( $n \geq 50$ ) sample size: **Balanta** ( $n=63$ ), **Bambara** ( $n=79$ ), **Fulbe** ( $n=402$ ), **Fali** ( $n=81$ ), **Kanembu** ( $n=50$ ), **Limba** ( $n=68$ ), **Malinke** ( $n=93$ ), **Mandenka** ( $n=142$ ), **Mende** ( $n=57$ ), **Temne** ( $n=122$ ), **Wolof** ( $n=59$ ); followed by groups comprising different ethnicities with common language/geography/origin: **AtIN** (multiple ethnic groups of Guinea-Bissau and Senegal, speaking Atlantic North,  $n=247$ ), **Chadic\_E\_Kanuri** (Chadic speakers from Cameroon of East origin: Hide ( $n=23$ ), Kotoko ( $n=56$ ), Mafa ( $n=31$ ), Masa ( $n=32$ ), and Kanuri ( $n=45$ )), **ChadicCameroon** (other Chadic speakers from Cameroon: Daba ( $n=20$ ), Mandara ( $n=37$ ), Podokwo ( $n=39$ ), Uldeme ( $n=27$ )), **ChadicNiger** (Chadic speakers from Niger: Buduma ( $n=30$ ), Hausa ( $n=20$ )), **MandeSpeak** (Mande

#### Figure S4 legend (continued)

speakers of Guinea-Bissau, Senegal, and Sierra Leone: Soninke (n=11), Jancanca (n=1), Bobo (n=5), Loko (n=30), Sussu (n=8), Soce (n=1), 4 unknown), **VoltaSpeak** (non-Bantoid Volta-Congo speakers of Cameroon, Nigeria, Mali, and Senegal: Dogon (n=6), Ivorienne (n=1), Senoufo (n=1), Tali (n=20), Tupuri (n=25), Yoruba (n=31)), and **SemBer** (Semitic and Berber speakers of Mauritania, Niger, West Sahara, Senegal, Niger: Maure (n=2), Tuareg (n=25), W Saharan (n=25), unknown (n=65)). The mtDNA variation in these 19 groups can be grouped into 5 clusters, representing the WC Afro-Asiatic and Volta-Congo speakers, NW Afro-Asiatic speakers, W Niger-Congo speakers, Fulbe+Mende and Mandenka, excluding ChadicNiger and Kanembu for insufficient sample size to stand alone (with “among group variation”  $V_A$  contributing to 2.55% of total variation, and “among populations within groups”  $V_B$  0.74%, both  $P<0.05$ ).

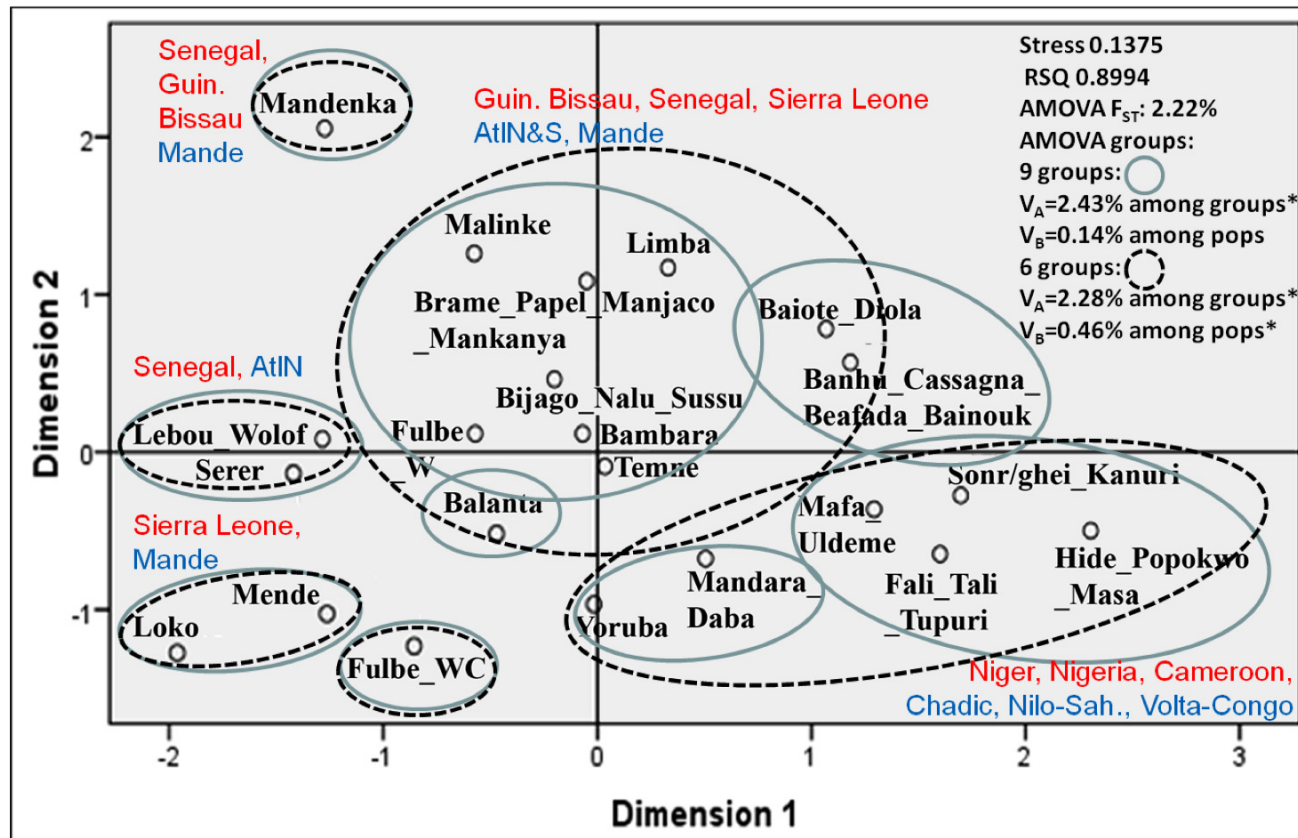

**Figure S5: MDS clustering of W/WC Africa divided by groups based on ethnical and language group affiliation.** Finally, we explored a new subdivision of W/WC/NW/C cluster based on ethnicity combined with language group info and partial geography, divided into 22 groups (as listed in **File S5**). These groups can be ideally clustered into 9 groups (the variation between the ethnic groups of each macro-group  $V_B$  is not significant), but Yoruba+Mandara\_Daba ( $n=82$ ), Balanta ( $n=63$ ), and Baiote\_Diola+Banhu\_Cassagna\_Beafada\_Bainouk ( $n=62$ ) have small number of samples to stand alone in admixture analysis and therefore 6 groups were used for estimating the admixture coefficients (based on SAMOVA grouping). The MDS plot characteristics and AMOVA either for all samples or 9 or 6 clusters are listed in the top right corner.



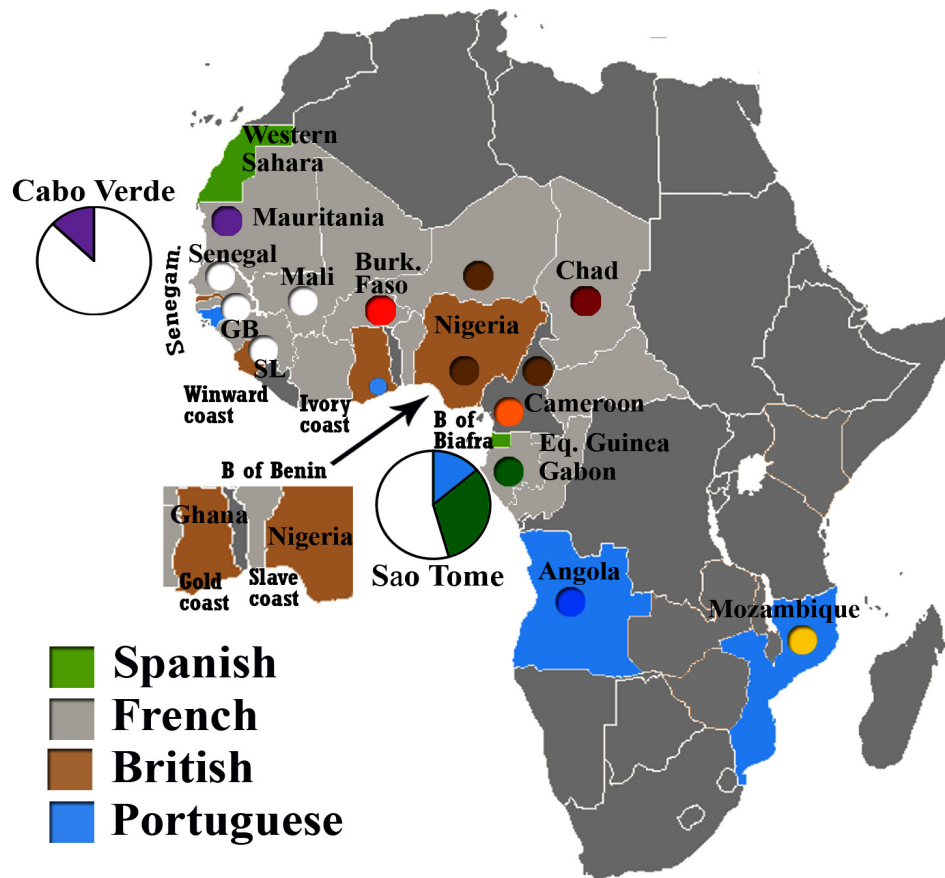

**Figure S6: Map of Africa with source W/WC, SW/WC Bantu, and SE African populations and their contribution to the admixed populations of São Tomé e Príncipe and Cabo Verde.** The pie charts show the relative contribution of mtDNA variation from the sampled populations of W/WC, SW/WC Bantu and SE Africa that founded to the populations of Cabo Verde and São Tomé e Príncipe. The relevant colonies are illustrated on the map along with the major historical coastlines of W/WC Africa matched to the current geography. In Cabo Verde, mainly the neighboring West African populations contributed mtDNA diversity (~87% from Senegambia region and ~13% from Mauritania/Western Sahara), while mtDNA of São Toméans was drawn both from directly neighboring SW/WC Bantu (Equatorial Guinea/Gabon and Angola) and W African populations (Senegambia) (40% vs. 60%).

**Table S6: The relative contribution of African regions to the admixed populations of the Americas and Africa**, analyzed using ADMIX and reported as a mean  $\pm$  SD (for details on admixed populations see **Text S1**). Founding African populations include SW/WC Bantu, and SE and W/WC Africa subdivided according to geography. W/WC Africa was also subdivided according to language and combination of ethnicity/language/geography\*. Estimates that did not fit our criteria (2SDs >0) yet were high and consistent enough to be considered guidance are indicated in grey (the high SD was due to combination of small sizes of both admixed population and source population) and the alternative relative contribution indicated by asterisk.

|                      | SE            | SW/WC Bantu     |              |                  | W/WC-geography                |                        |                |                |
|----------------------|---------------|-----------------|--------------|------------------|-------------------------------|------------------------|----------------|----------------|
|                      | Mozambique    | Angola          | Cameroon     | Gabon Eq. Guinea | GuinBis Mali Senegal Sier Leo | Niger Nigeria Cameroon | Maurit WSahara | Burkina Faso   |
| Pops (# of samples)  | n=417         | n=154           | n=359        | n=876            | n=1133                        | n=724                  | n=89           | n=97           |
| Sao Tome (n=152)     | x             | 13.9 $\pm$ 9.5* | x            | 31.6 $\pm$ 9*    | 54.5 $\pm$ 6*                 | x                      | x              | x              |
|                      |               | x               | x            | 40 $\pm$ 6       | 60 $\pm$ 6                    |                        |                |                |
| Cabo Verde (n=283)   | x             | x               | x            | x                | 87.2 $\pm$ 6                  | x                      | 12.8 $\pm$ 6   | x              |
| Brazil (n=404)       | 13.6 $\pm$ 4  | 32.3 $\pm$ 10   | x            | 12.9 $\pm$ 5     | 28.9 $\pm$ 6                  | 12.3 $\pm$ 6           | x              | x              |
| Colombia (n=69)      | 9.6 $\pm$ 4   | x               | x            | 27.5 $\pm$ 8     | 62.9 $\pm$ 7                  | x                      | x              | x              |
| Caribbean (n=283)    | x             | 24.9 $\pm$ 7    | x            | x                | 45.9 $\pm$ 8                  | 29.2 $\pm$ 9           | x              | x              |
| Cuba (n=112)         | x             | x               | 21 $\pm$ 7   | x                | 42.2 $\pm$ 10                 | 36.7 $\pm$ 10          | x              | x              |
| USA (n=704)          | 1.5 $\pm$ 2.5 | 17.6 $\pm$ 7    | 14.2 $\pm$ 6 | x                | 43.4 $\pm$ 6                  | 24.8 $\pm$ 7           | x              | x              |
|                      |               |                 |              |                  | 38.6 $\pm$ 7*                 | 22.3 $\pm$ 7*          | x              | 7.3 $\pm$ 3.5* |
| Philadelphia (n=191) | 2.8 $\pm$ 5.7 | 26.2 $\pm$ 11   | 15 $\pm$ 7   | x                | 21.7 $\pm$ 8                  | 37.2 $\pm$ 9           | x              | x              |

**Table S6 (continued)**

|                      | W/WC-language   |                             |                   | W/WC-Ethnic groups 1 |                   |                |                                      | W/WC-Ethnic groups 2    |                                |                                |                                 |
|----------------------|-----------------|-----------------------------|-------------------|----------------------|-------------------|----------------|--------------------------------------|-------------------------|--------------------------------|--------------------------------|---------------------------------|
|                      | AtINS+M<br>ande | Volta<br>Chadic<br>Nilo Sah | Berber<br>Semitic | W_Niger<br>Congo     | WC_AfA<br>s_Volta | Fulbe<br>Mende | Sem Ber<br>of Mali<br>Murit W<br>Sah | CamNig<br>ChadVolt<br>1 | Lebou<br>Wolof<br>Senegal<br>2 | Sen GB<br>Mali<br>SierLeo<br>3 | Fulbe<br>CamNig<br>BurkFas<br>4 |
| AA/# of samples      | n=1392          | n=593                       | n=181             | n=793                | n=542             | n=457          | n=116                                | n=429                   | n=93                           | n=751                          | n=230                           |
| Sao Tome (n=152)     | 58.2 ± 6        | x                           | x                 | 60.5 ± 6             | x                 | x              | x                                    | x                       | 45.4 ± 8                       | x                              | x                               |
|                      |                 |                             |                   |                      |                   |                |                                      | 28 ± 10*                | 32 ± 10*                       | x                              | x                               |
| Cabo Verde (n=283)   | 78.5 ± 9        | x                           | 21.5 ± 9          | 82.9 ± 8             | x                 | x              | 17.1 ± 8                             | x                       | 41 ± 23*                       | 59 ± 23*                       | x                               |
| Brazil (n=404)       | 25.7 ± 5        | 15.5 ± 5                    | x                 | 30.7 ± 5             | 10.5 ± 5          | x              | x                                    | 18.6 ± 7                | 22.6 ± 6                       | x                              | x                               |
| Colombia (n=69)      | 41.9 ± 10       | x                           | 21 ± 10           | 40.5 ± 11            | 12 ± 8            | x              | 10.4 ± 7                             | x                       | 55.6 ± 9                       | x                              | x                               |
| Caribbean (n=283)    | 45.6 ± 7        | 29.4 ± 7                    | x                 | 44 ± 9*              | 21 ± 7*           | 11 ± 7*        | x                                    | 27.1 ± 8                | x                              | 48.2 ± 7                       | x                               |
|                      |                 |                             |                   | 51.9 ± 7             | 23.2 ± 7          | x              |                                      |                         |                                |                                |                                 |
| Cuba (n=112)         | 47.9 ± 9        | 30.9 ± 9                    | x                 | 49.9 ± 9             | 29 ± 8            | x              | x                                    | 32.2 ± 10               | x                              | 46.8 ± 10                      | x                               |
| USA (n=704)          | 46.2 ± 5        | 22 ± 6                      | x                 | 36.7 ± 8             | 12.7 ± 5.5        | 18.8 ± 6       | x                                    | 18 ± 6                  | x                              | 37.8 ± 7                       | 12.4 ± 5                        |
| Philadelphia (n=191) | 27.4 ± 7        | 31.5 ± 8                    | x                 | 20 ± 11*             | 23 ± 7*           | 15 ± 8*        | x                                    | 30 ± 9*                 | x                              | 17 ± 10*                       | 11 ± 7*                         |
|                      |                 |                             |                   | 31.9 ± 7             | 27 ± 7.5          | x              |                                      | 33.1 ± 9                | x                              | 25.8 ± 7                       | x                               |

\*Note: For details on “W/WC-language” and “W/WC-Ethnic groups 1” see text in **Figures S3** and **S4**, respectively. For “W/WC-Ethnic groups 2” the groups are defined as follows (details in **Figure S5** and **Text S1**): Group 1: Chadic and Volta speakers of Cameroon, Niger, and Nigeria (Sonrhei, Songhai, Kanuri, Hide, Podokwo, Masa, Mafa, Uldeme, Fali, Tali, Tupuri, Mandara, Daba, Yoruba); Group 2: Atlantic N speakers of Senegal (Lebou, Wolof, Serer); Group 3: Atlantic N&S and Mande speakers of Guinea Bissau, Senegal, Mali, and Sierra Leone (Brame, Papel, Manjaco, Mankanya, Bijagó, Nalu, Sussu, Peul, Peulh, Poular, Tukulor, Fulbe, Limba, Temne, Bambara, Malinke, Baiote, Diola, Banhu, Cassanga, Beafada, Bainouk, Balanta); and Group 4: Fulbe of Cameroon, Burkina Faso, Nigeria, and Niger (Atlantic N).

**Table S7: Relative contribution of African regions to the admixed populations as represented in Figure 3b.** The contributions are adapted from **Table S6** (simplified and showing only the American admixed populations).

|              | SE             | SW/WC Bantu |        |                      | W/WC-geography                          |                              |
|--------------|----------------|-------------|--------|----------------------|-----------------------------------------|------------------------------|
|              | Mozam<br>bique | Angola      | Camer. | Gabon,<br>Eq. Guinea | G.Bis, Mali,<br>Senegal,<br>Sierra Leo. | Niger,<br>Nigeria,<br>Camer. |
| Brazil       | 14%            | 32%         | -      | 13%                  | 29%                                     | 12%                          |
| Colombia     | 10%            | -           | -      | 27%                  | 63%                                     | -                            |
| Caribbean    | -              | 25%         | -      | -                    | 46%                                     | 29%                          |
| Cuba         | -              | -           | 21%    | -                    | 42%                                     | 37%                          |
| USA          | -              | 18%         | 14%    | -                    | 43%                                     | 25%                          |
| Philadelphia | -              | 26%         | 15%    | -                    | 22%                                     | 37%                          |

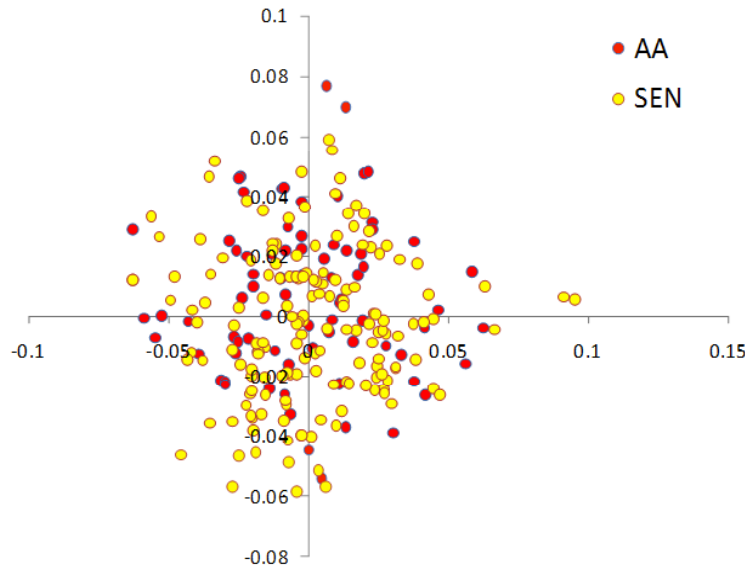

**Figure S7: MDS plot of Senegalese and Philadelphia African Americans based on AIMs.** MDS plot shows no clustering of Senegalese (yellow) or African Americans from Philadelphia (red, only samples with <5% of European ancestry were included) when AIMs designed to separate European and African ancestry (n=175) were used. Despite Philadelphia African Americans have only ~20% of West African ancestry with the other 80% being primarily drawn from WC/SW Africa, no obvious clustering was observed.

**Table S8: LnP(D) for STRUCTURE admixture estimate runs assuming 1-5 populations (K=1-5).**

|        | K=1        | K=2        | K=3               | K=4        | K=5        |
|--------|------------|------------|-------------------|------------|------------|
| LnP(D) | -387 072.7 | -269 592.9 | <b>-268 081.5</b> | -268 674.2 | -267 137.4 |

**Text S1: Detailed description of mtDNA database, grouping of African ethnic groups, the historical context for African/American populations, and admixture analysis using ADMIX.**

**1) Detailed description of mtDNA database**

The African part of mtDNA database focused mainly on the West and West-Central parts of Africa, but included all other parts of Africa (North, North-East, South-West, South, East, and most importantly South-East). It includes the following states (the number of sequences in brackets): Angola (154), Botswana (19), Burkina Faso (97), Cameroon (1074), Central African Republic (C.A.R., 130), Chad (124), Democratic Republic of Congo (D.R.C., 62), Egypt (125), Equatorial Guinea (45), Eritrea (8), Ethiopia (262), Gabon (907), Guinea-Bissau (372), Kenya (154), Mali (204), Mauritania (64), Morocco (92), Mozambique (417), Niger (88), Nigeria (171), Senegal (280), Sierra Leone (277), Somalia (27), South Africa (74), Sudan (80), West Sahara (25). The admixed populations included in the database were from: a) USA, namely African Americans from FBI database (n=765), including only the sequences sequenced using R 16,569, except 3 sequences that had various issues; Gullah/Geechee of South Carolina/Georgia (n=78), and Philadelphia (n=217 of African Americans and n=204 of European-Americans), b) Brazil (n=779), divided into Black Brazilians (n=277, with additional n=84 having only partial information), White Brazilians (n=171), and “population of Brazil” (n=247, noted by authors as predominantly white), c) Caribbean (n=313, African-Caribbeans), d) Cuba (n=245, general population), e) Afro-Colombians (n=95), and f) Uruguay (n=43, general population, this dataset was not used in the subsequent analysis because of insufficient sample size), and g) Africa (Cabo Verde, n=291 and São Tomé e Príncipe, n=153). While building the database, 16,182C and 16,183C (mostly linked to 16,189C mutation) were omitted because of inconsistent reporting among the publications. Further, mutation in position 16,390 was added when the sequencing primers ended before this position but the authors checked for L2 status using RFLP. The variation in the database was then collapsed into 429 distinct haplotypes that were defined while considering the variation within the database.

**2) Cluster separation of African variation based on ethnic groups.** Our database contains over 65 ethnicities in W/WC/NW/C region (after excluding Bantu and Pygmy). Most of these have insufficient sample size to accurately represent the mtDNA variation within each ethnicity. Since there is no unambiguous way of combining ethnic groups with small sample sizes, we approached this

problem from two directions. First, we identified ethnic groups with >45 samples (except Kanuri - an analysis outlier with small sample size) and grouped all other ethnicities into additional 7 groups, based on geography, language and reported origin (**Table S5**). These 19 groups were analyzed by SAMOVA and divided into 5 clusters: 1) WC speakers of Afro-Asiatic and Volta-Congo languages (comprised of Arabs, Chadic speakers of Cameroon, including eastern origin Fali, Kanuri, and a group of Volta speakers), 2) W speakers of Niger-Congo (including Atlantic North or Mande and single ethnic groups including Balanta, Bambara, Malinke, Limba, Wolof), 3) Mandenka, 4) Fulbe and Mende, and 5) Afro-Asiatic speakers of NW ( $v_A=2.55\%$ ,  $v_B=0.74\%$ , **Figure S4**). Second, we combined those ethnicities that belong into the same language group, collapsing the total data into 26 distinct groups of populations (**File S5**). Using the same SAMOVA grouping method and after excluding 4 outlying groups with small size, the remaining 22 groups can be reduced to 9 clusters that further need to be collapsed for the purpose of admixture analysis into 6, combining small and similar populations (9 groups:  $v_A=2.43\%$ ,  $v_B^*=0.14\%$ ; 6 groups:  $v_A=2.28\%$ ,  $v_B=0.46\%$ , where genetically similar groups with  $n<90$  were grouped; **Figure S5**). Notable difference was found in the Fulbe people of WC and W that were grouped in the previous analysis. Also, two new groups were separated from the West Niger-Congo cluster: Loko-Mende of Sierra Leone and Lebou-Wolof-Serer of Senegal. As discussed below, these groupings provide us with higher resolution in admixture analysis for some of the admixed populations.

### 3) The historical context of regions in Africa and sampled admixed populations.

The historical context of regions in Africa and sampled admixed populations from former colonies: 1) *Africa*: a) **SE**: Mozambique (Portuguese), Kenya (British); b) **SW/WC**: Angola/Cabinda (Portuguese), Gabon/Equatorial Guinea (Spanish/French), Cameroon (German, bordering British Nigeria); c) **W/WC**: Senegal + Mali (French)/Gambia + Sierra Leone (British)/Guinea Bissau (Portuguese) and Nigeria (British, part of the neighboring coast Portuguese)/Cameroon (German) and the Berber/Semitic speakers drawn mainly from Spanish West Sahara, French Mauritania and British Nigeria; 2) *Americas*: Philadelphia (British), USA (British, French, Spanish), Caribbean (British, Spanish, French, and other), Colombia (Spanish), Brazil (Portuguese).

**4) Detail description of admixture analysis using ADMIX.** The following datasets were used for calculating the admixture proportions for different populations, ignoring (or indicating in grey in **Table S6**) the contribution from founding populations whose admixture coefficients were outside 2 bootstrap standard deviations of 0:

- a) European and Native American admixture reflected in mtDNA pool of African Americans:** In order to establish the contribution of European, Native American and African populations to the primarily African admixed populations: African Brazilians (Braz\_AA, n=277), Afro-Colombians (Col\_AA, n=95), Afro-Caribbeans (Carib\_AA, n=313), African Americans from Philadelphia (Phila\_AA, n=217) or South Carolina/Georgia (Gul\_AA, n=78) or the whole USA (USA\_AA, n=765), we have used Europe combined with Eurasia, Native American, W/WC non-Bantu/non-Pygmy, Bantu of WC/SW, and SE African datasets as the parental populations. The African proportions were established as a sum of contributions from all three African regions.
- b) Within-Africa mtDNA origin of American admixed populations:** We have estimated the contribution of W/WC non-Bantu/non-Pygmy, Bantu of WC/SW, and SE Africa to the primarily African admixed populations Braz\_AA (n=404), Col\_AA (n=79), Carib\_AA (n=283), Phila\_AA (n=191), USA\_AA (n=704), as well as populations of mixed ancestry: Cuba (n=112), considering only the African-derived haplogroups (L, U6, U5b1b) for the admixed populations. We have further attempted to subdivide the contribution from W/WC non-Bantu/non-Pygmy, Bantu of SW/WC, and SE Africa into the predefined regions: 1) W/WC non-Bantu/non-Pygmy was separated according to geography (**Figure S3**), language (**Figure S4**), and ethnicity/geography/language (**Figure S5 and S6**), 2) Bantu of WC/SW was separated according to geography into Bantu of Cameroon, Equatorial Guinea and Gabon, and Angola, and 3) only Mozambique (as the more probable source of variation) in SE Africa was considered (also based on the fact that the calculated contribution from Kenya was found to be minimal).

#### **References S1:**

1. Allard MW, Polanskey D, Miller K, Wilson MR, Monson KL, et al. (2005) Characterization of human control region sequences of the African American SWGDAM forensic mtDNA data set. *Forensic Sci Int* 148: 169-179.
2. Alves-Silva J, da Silva Santos M, Guimaraes PE, Ferreira AC, Bandelt HJ, et al. (2000) The ancestry of Brazilian mtDNA lineages. *Am J Hum Genet* 67: 444-461.



3. Benn Torres J, Kittles RA, Stone AC (2007) Mitochondrial and Y chromosome diversity in the English-speaking Caribbean. *Ann Hum Genet* 71: 782-790.
4. Ely B, Wilson JL, Jackson F, Jackson BA (2006) African-American mitochondrial DNAs often match mtDNAs found in multiple African ethnic groups. *BMC Biol* 4: 34.
5. Goncalves VF, Carvalho CM, Bortolini MC, Bydlowski SP, Pena SD (2008) The phylogeography of African Brazilians. *Hum Hered* 65: 23-32.
6. Guerreiro V, Bisso-Machado R, Marrero A, Hunemeier T, Salzano FM, et al. (2009) Genetic signatures of parental contribution in black and white populations in Brazil. *Genetics and Molecular Biology* 32: 1-11.
7. Hunemeier T, Carvalho C, Marrero AR, Salzano FM, Junho Pena SD, et al. (2007) Niger-Congo speaking populations and the formation of the Brazilian gene pool: mtDNA and Y-chromosome data. *Am J Phys Anthropol* 133: 854-867.
8. Mendizabal I, Sandoval K, Berniell-Lee G, Calafell F, Salas A, et al. (2008) Genetic origin, admixture, and asymmetry in maternal and paternal human lineages in Cuba. *BMC Evol Biol* 8: 213.
9. Salas A, Acosta A, Alvarez-Iglesias V, Cerezo M, Phillips C, et al. (2008) The mtDNA ancestry of admixed Colombian populations. *Am J Hum Biol* 20: 584-591.
10. Sans M, Weimer TA, Franco MH, Salzano FM, Bentancor N, et al. (2002) Unequal contributions of male and female gene pools from parental populations in the African descendants of the city of Melo, Uruguay. *Am J Phys Anthropol* 118: 33-44.
11. Silva WA, Bortolini MC, Schneider MP, Marrero A, Elion J, et al. (2006) MtDNA haplogroup analysis of black Brazilian and sub-Saharan populations: implications for the Atlantic slave trade. *Hum Biol* 78: 29-41.
12. Stefflova K, Dulik MC, Pai AA, Walker AH, Zeigler-Johnson C, et al. (2009) Evaluation of Group Genetic Ancestry of Populations from Philadelphia and Dakar in the Context of Sex-biased Admixture in the Americas. Accepted in PLoS ONE.
13. Beleza S, Gusmao L, Amorim A, Carracedo A, Salas A (2005) The genetic legacy of western Bantu migrations. *Hum Genet* 117: 366-375.
14. Brandstatter A, Peterson CT, Irwin JA, Mpoke S, Koech DK, et al. (2004) Mitochondrial DNA control region sequences from Nairobi (Kenya): inferring phylogenetic parameters for the establishment of a forensic database. *Int J Legal Med* 118: 294-306.
15. Brehm A, Pereira L, Bandelt HJ, Prata MJ, Amorim A (2002) Mitochondrial portrait of the Cabo Verde archipelago: the Senegambian outpost of Atlantic slave trade. *Ann Hum Genet* 66: 49-60.
16. Cerny V, Hajek M, Cmejla R, Bruzek J, Brdicka R (2004) mtDNA sequences of Chadic-speaking populations from northern Cameroon suggest their affinities with eastern Africa. *Ann Hum Biol* 31: 554-569.
17. Cerny V, Hajek M, Bromova M, Cmejla R, Diallo I, et al. (2006) MtDNA of Fulani nomads and their genetic relationships to neighboring sedentary populations. *Hum Biol* 78: 9-27.
18. Cerny V, Salas A, Hajek M, Zaloudkova M, Brdicka R (2007) A bidirectional corridor in the Sahel-Sudan belt and the distinctive features of the Chad Basin populations: a history revealed by the mitochondrial DNA genome. *Ann Hum Genet* 71: 433-452.
19. Chen YS, Olckers A, Schurr TG, Kogelnik AM, Huoponen K, et al. (2000) mtDNA variation in the South African Kung and Khwe- and their genetic relationships to other African populations. *Am J Hum Genet* 66: 1362-1383.

20. Coia V, Destro-Bisol G, Verginelli F, Battaglia C, Boschi I, et al. (2005) Brief communication: mtDNA variation in North Cameroon: lack of Asian lineages and implications for back migration from Asia to sub-Saharan Africa. *Am J Phys Anthropol* 128: 678-681.
21. Destro-Bisol G, Coia V, Boschi I, Verginelli F, Caglia A, et al. (2004) The analysis of variation of mtDNA hypervariable region 1 suggests that Eastern and Western Pygmies diverged before the Bantu expansion. *Am Nat* 163: 212-226.
22. Gonzalez AM, Cabrera VM, Larruga JM, Tounkara A, Noumsi G, et al. (2006) Mitochondrial DNA variation in Mauritania and Mali and their genetic relationship to other Western Africa populations. *Ann Hum Genet* 70: 631-657.
23. Jackson BA, Wilson JL, Kirbah S, Sidney SS, Rosenberger J, et al. (2005) Mitochondrial DNA genetic diversity among four ethnic groups in Sierra Leone. *Am J Phys Anthropol* 128: 156-163.
24. Kivisild T, Reidla M, Metspalu E, Rosa A, Brehm A, et al. (2004) Ethiopian mitochondrial DNA heritage: tracking gene flow across and around the gate of tears. *Am J Hum Genet* 75: 752-770.
25. Mateu E, Comas D, Calafell F, Perez-Lezaun A, Abade A, et al. (1997) A tale of two islands: population history and mitochondrial DNA sequence variation of Bioko and Sao Tome, Gulf of Guinea. *Ann Hum Genet* 61: 507-518.
26. Pereira L, Macaulay V, Torroni A, Scozzari R, Prata MJ, et al. (2001) Prehistoric and historic traces in the mtDNA of Mozambique: insights into the Bantu expansions and the slave trade. *Ann Hum Genet* 65: 439-458.
27. Plaza S, Salas A, Calafell F, Corte-Real F, Bertranpetit J, et al. (2004) Insights into the western Bantu dispersal: mtDNA lineage analysis in Angola. *Hum Genet* 115: 439-447.
28. Quintana-Murci L, Quach H, Harmant C, Luca F, Massonnet B, et al. (2008) Maternal traces of deep common ancestry and asymmetric gene flow between Pygmy hunter-gatherers and Bantu-speaking farmers. *Proc Natl Acad Sci U S A* 105: 1596-1601.
29. Rando JC, Pinto F, Gonzalez AM, Hernandez M, Larruga JM, et al. (1998) Mitochondrial DNA analysis of northwest African populations reveals genetic exchanges with European, near-eastern, and sub-Saharan populations. *Ann Hum Genet* 62: 531-550.
30. Richards M, Macaulay V, Hickey E, Vega E, Sykes B, et al. (2000) Tracing European founder lineages in the Near Eastern mtDNA pool. *Am J Hum Genet* 67: 1251-1276.
31. Rosa A, Brehm A, Kivisild T, Metspalu E, Villems R (2004) MtDNA profile of West Africa Guineans: towards a better understanding of the Senegambia region. *Ann Hum Genet* 68: 340-352.
32. Salas A, Richards M, De la Fe T, Lareu MV, Sobrino B, et al. (2002) The making of the African mtDNA landscape. *Am J Hum Genet* 71: 1082-1111.
33. Stevanovitch A, Gilles A, Bouzaid E, Kefi R, Paris F, et al. (2004) Mitochondrial DNA sequence diversity in a sedentary population from Egypt. *Ann Hum Genet* 68: 23-39.
34. Trovada MJ, Pereira L, Gusmao L, Abade A, Amorim A, et al. (2004) Pattern of mtDNA variation in three populations from Sao Tome e Principe. *Ann Hum Genet* 68: 40-54.
35. Watson E, Forster P, Richards M, Bandelt HJ (1997) Mitochondrial footprints of human expansions in Africa. *Am J Hum Genet* 61: 691-704.
36. Fagundes NJ, Kanitz R, Eckert R, Valls AC, Bogo MR, et al. (2008) Mitochondrial population genomics supports a single pre-Clovis origin with a coastal route for the peopling of the Americas. *Am J Hum Genet* 82: 583-592.

37. Li H, Cai X, Winograd-Cort ER, Wen B, Cheng X, et al. (2007) Mitochondrial DNA diversity and population differentiation in southern East Asia. *Am J Phys Anthropol* 134: 481-488.
38. Malyarchuk BA, Grzybowski T, Derenko MV, Czarny J, Drobni K, et al. (2003) Mitochondrial DNA variability in Bosnians and Slovenians. *Ann Hum Genet* 67: 412-425.
39. Brion M, Sanchez JJ, Balogh K, Thacker C, Blanco-Verea A, et al. (2005) Introduction of an single nucleotide polymorphism-based "Major Y-chromosome haplogroup typing kit" suitable for predicting the geographical origin of male lineages. *Electrophoresis* 26: 4411-4420.
40. Hammer MF, Chamberlain VF, Kearney VF, Stover D, Zhang G, et al. (2006) Population structure of Y chromosome SNP haplogroups in the United States and forensic implications for constructing Y chromosome STR databases. *Forensic Sci Int* 164: 45-55.
41. Silva DA, Carvalho E, Costa G, Tavares L, Amorim A, et al. (2006) Y-chromosome genetic variation in Rio de Janeiro population. *Am J Hum Biol* 18: 829-837.
42. Vallone PM, Butler JM (2004) Y-SNP typing of U.S. African American and Caucasian samples using allele-specific hybridization and primer extension. *J Forensic Sci* 49: 723-732.
43. Goncalves R, Freitas A, Branco M, Rosa A, Fernandes AT, et al. (2005) Y-chromosome lineages from Portugal, Madeira and Acores record elements of Sephardim and Berber ancestry. *Ann Hum Genet* 69: 443-454.
44. Goncalves R, Spinola H, Brehm A (2007) Y-chromosome lineages in Sao Tome e Principe islands: evidence of European influence. *Am J Hum Biol* 19: 422-428.
45. Cruciani F, Santolamazza P, Shen P, Macaulay V, Moral P, et al. (2002) A back migration from Asia to sub-Saharan Africa is supported by high-resolution analysis of human Y-chromosome haplotypes. *Am J Hum Genet* 70: 1197-1214.
46. Luis JR, Rowold DJ, Regueiro M, Caeiro B, Cinnioglu C, et al. (2004) The Levant versus the Horn of Africa: evidence for bidirectional corridors of human migrations. *Am J Hum Genet* 74: 532-544.
47. Robino C, Crobu F, Di Gaetano C, Bekada A, Benhamamouch S, et al. (2008) Analysis of Y-chromosomal SNP haplogroups and STR haplotypes in an Algerian population sample. *Int J Legal Med* 122: 251-255.
48. Rosa A, Ornelas C, Jobling MA, Brehm A, Villems R (2007) Y-chromosomal diversity in the population of Guinea-Bissau: a multiethnic perspective. *BMC Evol Biol* 7: 124.
49. Tishkoff SA, Gonder MK, Henn BM, Mortensen H, Knight A, et al. (2007) History of click-speaking populations of Africa inferred from mtDNA and Y chromosome genetic variation. *Mol Biol Evol* 24: 2180-2195.
50. Wood ET, Stover DA, Ehret C, Destro-Bisol G, Spedini G, et al. (2005) Contrasting patterns of Y chromosome and mtDNA variation in Africa: evidence for sex-biased demographic processes. *Eur J Hum Genet* 13: 867-876.
51. Yaeger R, Avila-Bront A, Abdul K, Nolan PC, Grann VR, et al. (2008) Comparing genetic ancestry and self-described race in african americans born in the United States and in Africa. *Cancer Epidemiol Biomarkers Prev* 17: 1329-1338.
52. Benn-Torres J, Bonilla C, Robbins CM, Waterman L, Moses TY, et al. (2008) Admixture and population stratification in African Caribbean populations. *Ann Hum Genet* 72: 90-98.
53. Salzano FM, Bortolini MC (2002) *Evolution and Genetics of Latin American Populations*. . Cambridge: Cambridge University Press.
